# Supplementary material for: Selective co-aggregation of gold nanoparticles functionalised with complementary hydrogen-bonding groups
Source: Royal Society of Chemistry journal article supplement (doi:10.1039/b711435d), 2007-01-01
Supplement: b711435d.pdf [file b711435d.pdf]

**- Electronic Supplementary Information -**

**Selective co-aggregation of gold nanoparticles  
functionalised with  
complementary hydrogen bonding groups**

*Coenraad R. van den Brom,<sup>a,b</sup> Petra Rudolf,<sup>a</sup> Thomas T.M. Palstra<sup>\*a</sup> and Bart Hessen<sup>\*b</sup>*

**Contents**

- 1.** Determination of association constants of **1** and **2**
- 2.** Synthesis and characterisation of the cluster compound **4**
- 3.** *Hetero*-aggregates of **3** and **4**
- 4.** *Homo*-aggregation of **4**
- 5.** *Hetero*-aggregation of **3** and **4** in the presence of 1-*n*-hexyl-thymine
- 6.** References

<sup>a</sup> Zernike Institute for Advanced Materials, University of Groningen, Nijenborgh 4, 9747 AG Groningen, The Netherlands. Fax: +31 50 363 4441; Tel: +31 50 363 4419; E-mail t.t.m.palstra@rug.nl

<sup>b</sup> Stratingh Institute for Chemistry and Chemical Engineering, University of Groningen, Nijenborgh 4, 9747 AG Groningen, The Netherlands. Fax: +31 50 363 4315; Tel: +31 50 363 4322; E-mail: b.hessen@rug.nl

## 1. Determination of association constants of **1** and **2**

The self-association behaviour of **1** and 6-(8-benzyl-sulfanyl-octyl)-[1,3,5]-triazine-2,4-diamine (**2a**) in CDCl<sub>3</sub> was studied. Here, **2a** was used rather than **2** because of the limited solubility of the latter in CDCl<sub>3</sub>. Both **1** and **2a** show a concentration dependent shift for their amine-protons, indicative of homo-association.

*Experimental* All NMR-titration experiments were carried out with CDCl<sub>3</sub> freshly dried by filtration over activated (neutral) aluminium oxide powder. NMR-tubes were dried overnight at 150 °C before use. The titration series were prepared according to the guidelines of Wilcox<sup>1</sup>. The obtained chemical shifts were fitted as a function of the initial monomer concentration, using a fit function derived from an appropriate binding model that only includes dimerisation, assuming that the formation of complexes of a higher order than dimers is negligible:<sup>2</sup>

$$\delta_{\text{obs}} = \delta_{\text{H}} + \frac{x}{N} \cdot \frac{1 + 4A_0 - \sqrt{1 + 8A_0K_{\text{ass}}}}{8A_0K_{\text{ass}}} (\delta_{\text{HH}} - \delta_{\text{H}})$$

Here,  $\delta_{\text{obs}}$ ,  $\delta_{\text{H}}$  and  $\delta_{\text{HH}}$  are the observed chemical shift, and the shifts of a non-hydrogen-bonded and a hydrogen-bonded proton, respectively.  $N$  is the number of equivalent protons in the molecule, whose shift is monitored, and  $x$  is the number of H-bonded protons in the dimerised molecule.  $A_0$  is the overall concentration of the species and  $K_{\text{ass}}$  is the dimerisation constant. The complexation induced shift (CIS) is defined as  $\text{CIS} = \delta_{\text{obs}} - \delta_{\text{H}}$ . Fits were performed with a non-linear regression algorithm in Mathematica (Wolfram Research).

To study homo-association, stock solutions of 0.1M **1** or **2a** in CDCl<sub>3</sub> were prepared. Test solutions were made by diluting an amount of stock solution up to a total volume of 500  $\mu\text{l}$ . Test solutions were prepared at concentrations ranging from 2 to 100 mM. All measurements were performed at 25 °C.

To study hetero-association, stock solutions of **1** and **2a** (8mM) in CDCl<sub>3</sub> were prepared by dissolution of 10.22 mg of **1** (37.5  $\mu\text{mol}$ ) and 13.82 mg of **2a** (37.5  $\mu\text{mol}$ ), respectively. Test solutions of 0.8 ml were prepared with a constant total concentration of ( $[\mathbf{1}] + [\mathbf{2a}]$ ) = 8 mM. The fraction of **1** (defined as  $f_1 = [\mathbf{1}] / ([\mathbf{1}] + [\mathbf{2a}])$ ) was varied from 0.2 to 0.8 in 11 equidistant steps. The amine chemical shift of thymine was monitored and used to compile a Job-plot, according to the formula<sup>2</sup>  $F_{\text{Job}} = f_1(\delta_{\text{obs}} - \delta_{\text{homo}})$ . The chemical shift in the absence of **2a**,  $\delta_{\text{homo}}$  was calculated from its homo-dimerisation constant using the model and data presented above.

*Results* NMR titration curves for **1** and **2a** are shown in figure S1. For **1**,  $K_{\text{ass}} = 4.7 \text{ M}^{-1}$  and  $\text{CIS} = 3.4 \text{ ppm}$ ; for **2a**  $K_{\text{ass}} = 2.3 \text{ M}^{-1}$  and  $\text{CIS} = 5.1 \text{ ppm}$ . These values are close to those obtained for 1-*N*-propylthymine ( $4.3 \text{ M}^{-1}$ ) and for 2,4-diamino-6-dodecyl-[1,3,5]triazine ( $2.2 \text{ M}^{-1}$ ).<sup>3</sup> The Job-plot for **1-2a** association presented in figure S2 has a maximum at 0.5 indicative of the formation of the expected 1:1 complexes. The agreement of the H-bonding behaviour of the separate ligands with literature, makes it likely that the association constant of the hetero-complex also corresponds to the value of *ca.*  $890 \text{ M}^{-1}$  reported for the dimerisation of the homologous complex of 6-dodecyl-[1,3,5]triazine-2,4-diamine and 1-*N*-propylthymine in literature.<sup>3</sup>

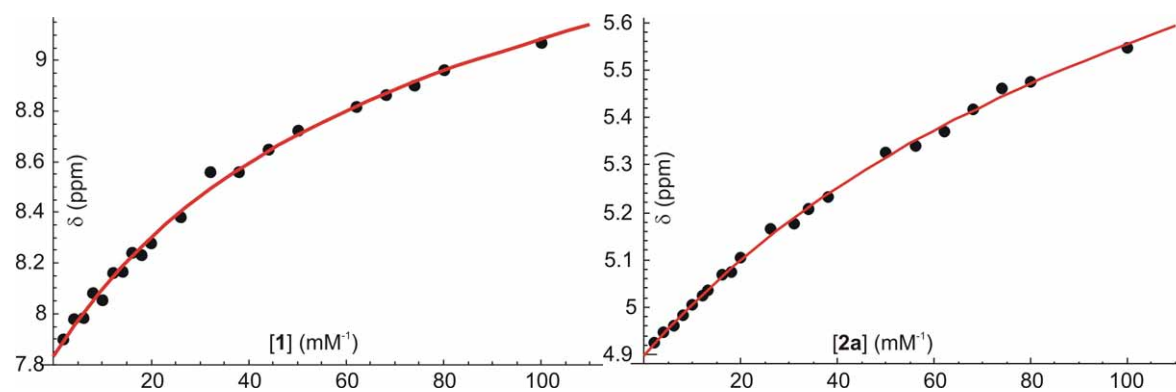

**Figure S1.** NMR titration curves of **1** (left) and **2a** (right). The measured values are represented by dots, the curves represent fits based on a dimerisation model.

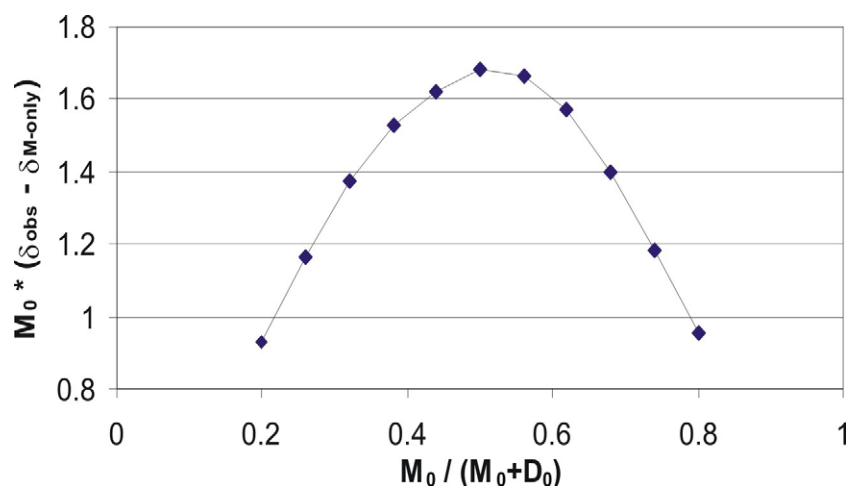

Figure S2. Job-plot of **1** and **2a**, at a 'total concentration' of  $[1]_0 + [2]_0 = 8$  mM.

## 2. Synthesis and characterisation of the cluster compound **4**

$Au_{55}[P(C_6H_5)_3]_{12}Cl_6$  clusters were synthesised according to a method described in literature<sup>4</sup> and functionalised with either **2** via a ligand-exchange reactions. A fine powder was made of 12.7 mg of **2** (49  $\mu$ mol) and was suspended ultrasonically in 50 ml  $CH_2Cl_2$ . To a Schlenk-flask containing 20 mg (1.4  $\mu$ mol) of  $Au_{55}[P(C_6H_5)_3]_{12}Cl_6$  50 ml of benzene was added. The DTOT-suspension was then added to the dark-brown  $Au_{55}$  solution via a septum. After stirring for 21 hours, a dark suspension in a colorless solution resulted. It was centrifuged at 4000 rpm for 30 min. and decanted. Then, the material was further purified by suspending ultrasonically in 50~ml acetonitrile, centrifuging and decanting three times and drying in vacuo. Yield: 16~mg.

*Transmission electron microscopy:* TEM investigations were carried out with a Philips CEM 120 transmission electron microscope, equipped with a  $LaB_6$  filament. The microscope was operated at 120 kV. Images were acquired with a built-in Gatan 794 CCD-camera (1024 $\times$ 1024 pixels), controlled by Gatan Digital Micrograph v3.5 software. A TEM sample of **4** was investigated using an amorphous carbon support-film of several nanometers thickness on a 3 mm 400  $\mu$ m mesh copper grid, on which, the cluster material was deposited from a dilute solution in DMSO, putting a droplet of about 0.05 ml on the film, rapidly followed by blotting off most liquid with filtration paper. A representative micrograph and corresponding cluster size distribution are displayed in figure S3. De size distribution was determined by digital image analysis using Matrox Inspector 2.1.

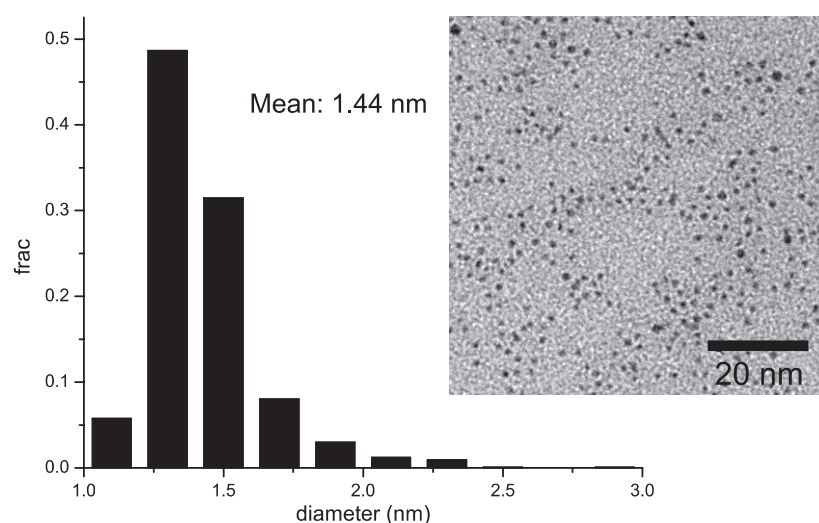

Figure S3. Transmission electron microscopy of  $Au_{55}DTOT_{15}[P(C_6H_5)_3]_8Cl_4$  (**4**)

*X-ray Photoelectron Spectroscopy:* An XPS sample of **4** was prepared by spreading a small amount of its powder on a piece of weighing paper and picking it up with a piece of conductive carbon tape (SPI Supplies) stuck on a stainless steel sampleholder. XPS measurements were performed using a SSX-100 (Surface Science Instruments, West Sussex, UK) photoelectron spectrometer with a monochromatic Al  $K_{\alpha}$  X-ray source ( $h\nu = 1486.6$  eV). The energy resolution was set to 1.5 eV to minimize data acquisition time and the photoelectron take-off angle (TOA) was  $37^{\circ}$ . All binding energies were referenced to the Au  $4f_{7/2}$  core level at 83.8 eV.<sup>5</sup> The base pressure in the spectrometer was in the low  $10^{-9}$  mbar range. Spectral analysis included a linear background subtraction and peak reconstruction using mixed Gaussian-Lorentzian functions on a Shirley background, in a least squares curve-fitting program (Winspec) developed in the Laboratoire Interdisciplinaire de Spectroscopie Electronique, Facultés Universitaires Notre-Dame de la Paix, Namur, Belgium. The photoemission peak areas of each element, used to estimate the amount of each species on the surface, were normalized by the sensitivity factors of each element tabulated for the SSX-100 photoelectron spectrometer. XPS spectra and fits for the Au  $4f$ , P  $2p$ , N  $1s$ , Cl  $2p$  and P  $2p$  regions of **4** are displayed in figure S4. Results of the stoichiometric analysis can be found in table ST1.

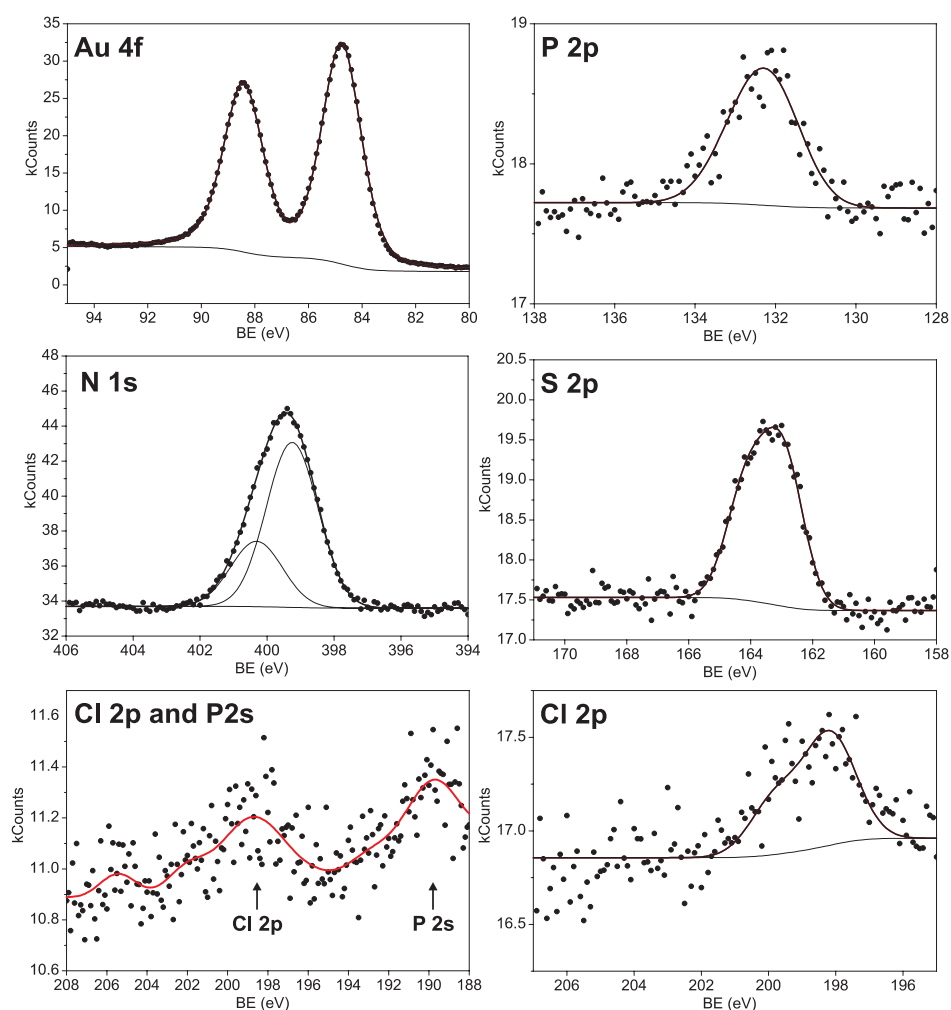

**Figure S4.** X-ray photoemission spectra of **4**. Measured data are represented by dots. Backgrounds and peak shapes obtained by modelling are shown as lines. In the *wide* Cl  $2p$  spectrum a smoothed spectrum is included.

| Line     | BE (eV) | FWHM (eV)        | Stoich.         | at-% |
|----------|---------|------------------|-----------------|------|
| Au 4f    | 84.6    | 1.8              | 55 <sup>a</sup> | 34   |
| S 2p     | 162.8   | 1.8              | 15 ± 1          | 10   |
| N 1s (1) | 399.1   | 1.8 <sup>b</sup> | 54 ± 3          | 34   |
| N 1s (2) | 400.1   | 1.8 <sup>b</sup> | 21              | 14   |
| P 2p     | 131.8   | 1.8 <sup>c</sup> | 8 ± 1           | 5    |
| Cl 2p    | 198.0   | 1.8 <sup>c</sup> | 4 ± 1           | 2    |

<sup>a</sup>Reference value

<sup>b</sup>Linked widths for these peaks

<sup>c</sup>Fixed widths

**Table ST1.** Stoichiometric analysis of XPS data of Au<sub>55</sub>-*MOT*

*Thermal analysis:* TGA measurements of **4** were performed with a TGA 7 (Perkin Elmer). 3–7 mg of material was heated in a platinum crucible at 10° C/min in a nitrogen atmosphere. Expected stoichiometry for **4**: Au<sub>55</sub>*DTOT*<sub>15</sub>[P(C<sub>6</sub>H<sub>5</sub>)<sub>3</sub>]<sub>8</sub>Cl<sub>4</sub>, MW : 16888.88, expected mass loss: 36%, found: 30 %.

DSC analysis of **4** was performed with a DSC2920 (TA Instruments) by heating 3–4 mg of material in an aluminium pan at 10° C/min. The resulting calorigram is displayed in figure S5.

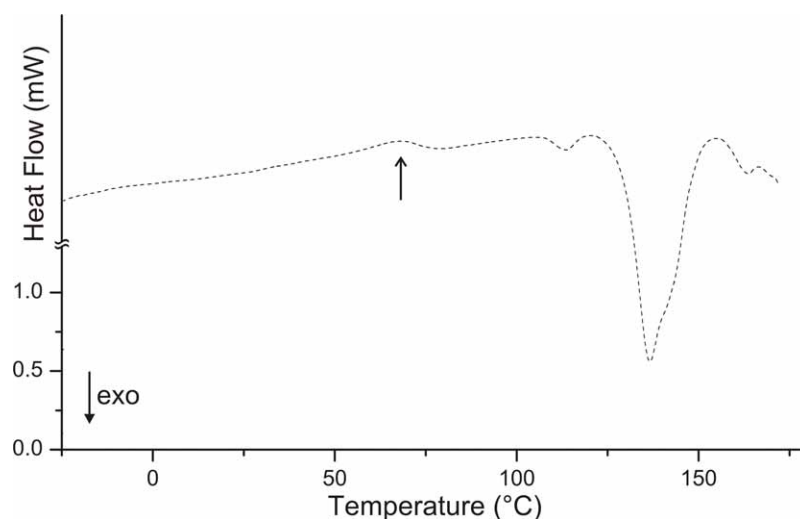

**Figure S5.** DSC analysis of **4**. The exothermal peak at 136.7°C (onset 129.4°C) corresponds to destruction of the cluster, which is observed at similar temperatures for other Au<sub>55</sub> clusters.<sup>5</sup> The weak endothermal peak at 66°C (onset 46°C) is ascribed to a “melting” phase transition of the ligand shell.<sup>6</sup>

### 3. *Hetero-aggregates of 3 and 4*

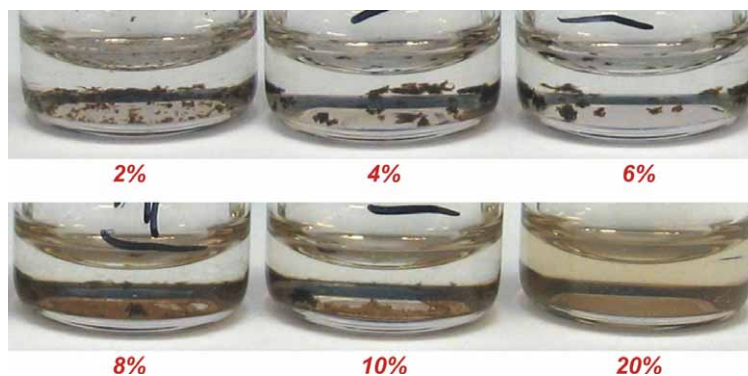

**Figure S6.** Photograph of vials ( $\varnothing$  ca 1.1 cm) containing aggregates formed in DMSO/dioxane mixtures when varying the DMSO concentrations from 2 to 20 % (v/v).

#### 4. *Homo*-aggregation of **4**

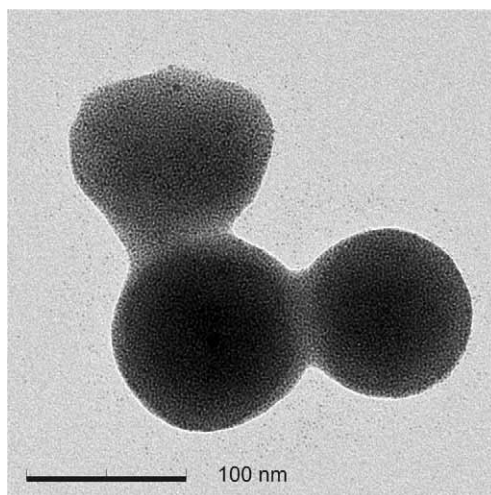

**Figure S7.** TEM micrograph of a typical example of the dense spherical aggregates of **4** formed from a mixture of 0.12 mg/ml **4** in DMSO/1,4-dioxane containing 2%(v/v) DMSO.

#### 5. *Hetero*-aggregation of **3** and **4** in the presence of 1-*n*-hexyl-thymine

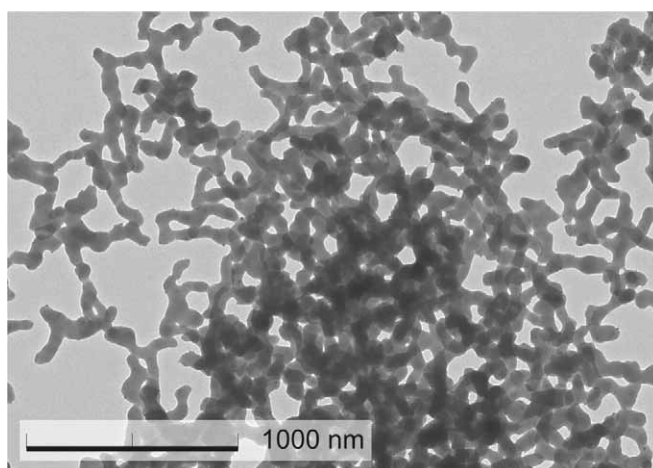

**Figure S8.** Morphology of *hetero*-aggregates of **3** and **4**, formed in the presence of  $1.2 \cdot 10^3$  equivalents of 1-*n*-hexyl-thymine (**5**).

#### 7. References

1. C. S. Wilcox, in *Frontiers in Supramolecular Organic Chemistry and Photochemistry*, ed. H.-J. Schneider, H. Dürr, VCH, Weinheim, 1991, Ch. 6, pp. 123-143.
2. K. A. Connors, *Binding Constants*, John Wiley & Sons, New York, 1987.
3. F. H. Beijer, R. P. Sijbesma, J. A. J. M. Vekemans, E. W. Meijer, H. Kooijman, and A. L. Spek, *J. Org. Chem.*, 1996, **61**, 6371–6380.
4. G. Schmid, *Inorg. Synth.*, 1990, **27**, 214–218.
5. R. C. Thiel, R. E. Benfield, R. Zanoni, H. H. A. Smit, and M. W. Dirken, *Struct. Bond.*, 1993, **81**, 1–39.
6. R. H. Terrill, T. A. Postlethwaite, C. Chen, C.-D. Poon, A. Terzis, A. Chen, J. E. Hutchison, M. R. Clark, G. Wignall, J. D. Londono, R. Superfine, M. Falvo, C. S. Johnson Jr., E. T. Samulski, and R. W. Murray, *J. Am. Chem. Soc.*, 1995, **117**, 12537–12548.
